# Supplementary material
Source: PubMed Central journal article supplement (PMC2876965)

## Supplementary Table S1

|                                     | <b>Forward Primer</b>         | <b>Reverse Primer</b>         |
|-------------------------------------|-------------------------------|-------------------------------|
| <b>MAP1-LC3b (1)</b>                | <b>cactgctctgtcttgttaggtg</b> | <b>tcgttgccctttattagtgcac</b> |
| <b>Murf-1</b>                       | <b>acctgctggaggaaaacac</b>    | <b>cttcgtgttccttgccacac</b>   |
| <b>FoxO3</b>                        | <b>accttcgtctctgaactcctg</b>  | <b>ctgtggctgagtgagctgaag</b>  |
| <b>Atrogin 1 (1)</b>                | <b>gcaaacactgccacattctctc</b> | <b>cttgaggggaaagtgagacg</b>   |
| <b>BNIP3 (1)</b>                    | <b>ttccactagcacctctgatga</b>  | <b>gaacaccgcattacagaacaa</b>  |
| <b>DRP1</b>                         | <b>gttcacgccaacagaatac</b>    | <b>cctaaccctgaatgaagt</b>     |
| <b>Fis1</b>                         | <b>aagtatgtgcgaggctgt</b>     | <b>tgctaccagtccatcttc</b>     |
| <b><math>\beta</math>-actin (1)</b> | <b>ctggctctagcaccatgaagat</b> | <b>ggtggacagtgaggccaggat</b>  |

### REFERENCE:

1. Mammucari C, Milan G, Romanello V, Masiero E, Rudolf R, *et al.* (2007) FoxO3 Controls Autophagy in Skeletal Muscle In Vivo *Cell Metab* 6: 458-471.

## Supplementary Table S2

| TARGET GENE     | TARGET SEQUENCE                                                            | EFFICIENCY OF PROTEIN KNOCKDOWN |
|-----------------|----------------------------------------------------------------------------|---------------------------------|
| FoxO3 (oligo 1) | tgaaggcagggcaagagc (1)                                                     | 95%                             |
| FoxO3 (oligo 2) | ggaaatgctcctcgcgcg (1)                                                     | 95%                             |
| Bnip3 (oligo 1) | cagctcctctctattta (2)                                                      | 90%                             |
| Bnip3 (oligo 2) | taccaacagagctgaaata (1)                                                    | 80%                             |
| Lac Z           | gactacacaaatcagcgattt (1)                                                  | -                               |
| AMPK alpha      | gagaagcagaagcagcagc                                                        | 90%                             |
| Fis1(oligo 4)   | gggcaactaccggctcaagga<br>Invitrogen BLOCK-IT™<br>miR RNAi Select Mmi559435 | 90%                             |
| miR-scramble    | gtctccagcgcagtacattt                                                       | -                               |

Quantification of knockdown was performed considering the efficiency of transfection and the percentage of target protein decrease

### REFERENCES:

1. Mammucari C, Milan G, Romanello V, Masiero E, Rudolf R, *et al.* (2007) FoxO3 Controls Autophagy in Skeletal Muscle In Vivo *Cell Metab* 6: 458-471.
2. Hamacher-Brady A, Brady NR, Logue SE, Sayen MR, Jinno M, *et al.* (2007) Response to myocardial ischemia/reperfusion injury involves Bnip3 and autophagy *Cell Death Differ* 14: 146-157

# Supplementary Figure S1

Atg7 KO

Fed

Fasting

pDsRed2-Mito

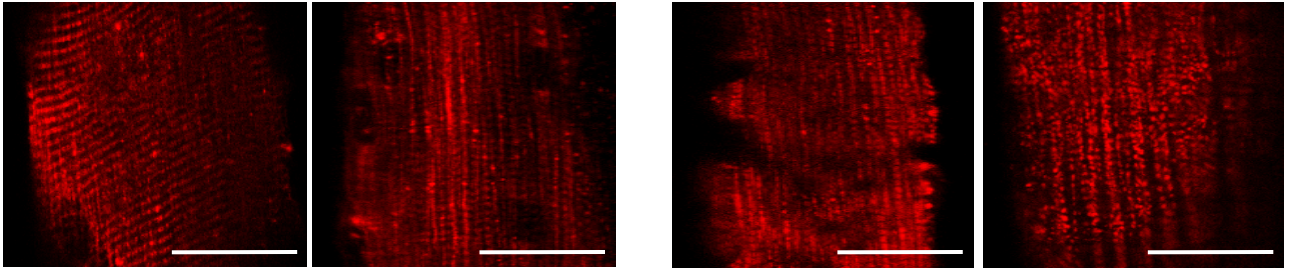

## Supplementary Figure S2

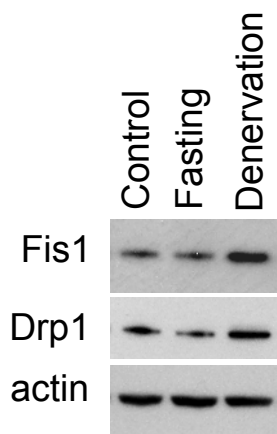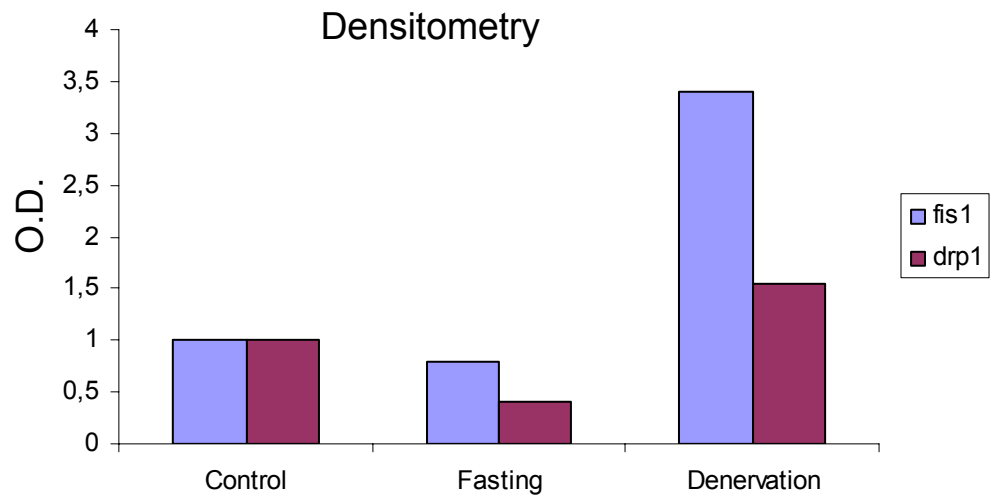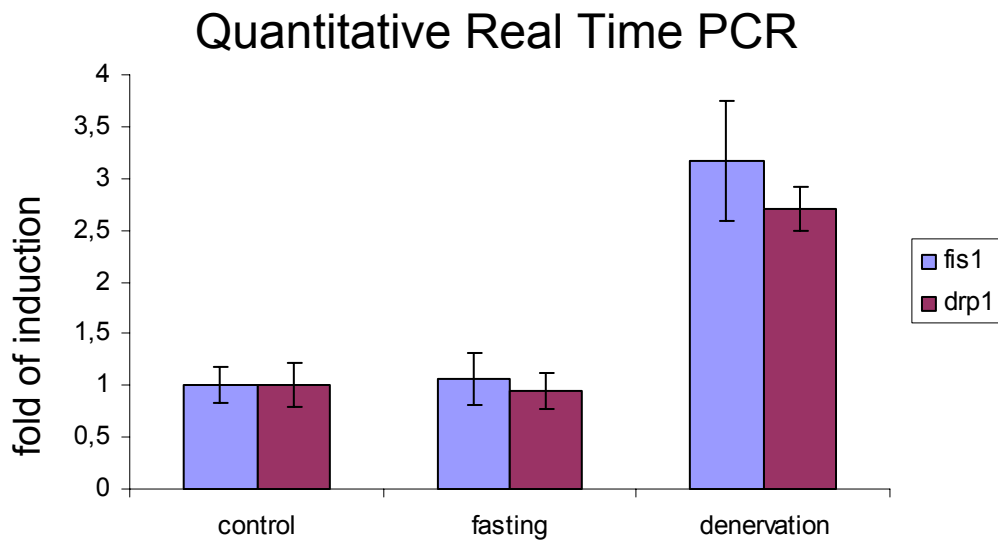

# Supplementary Figure S3

**A**

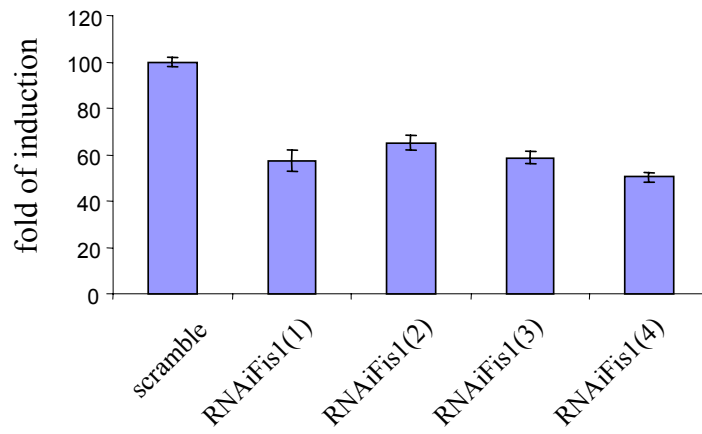

**B**

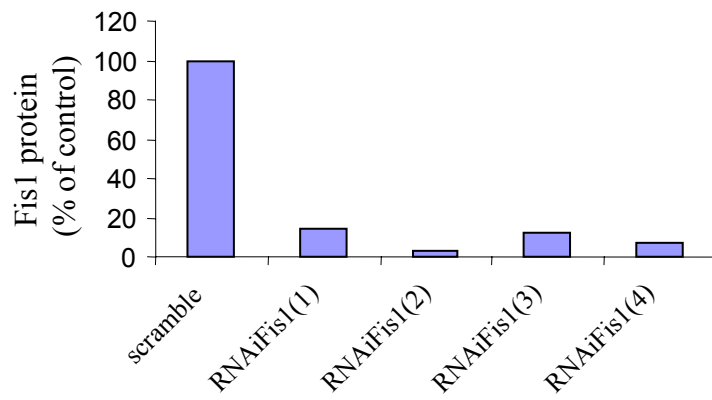

## Supplementary Figure S4

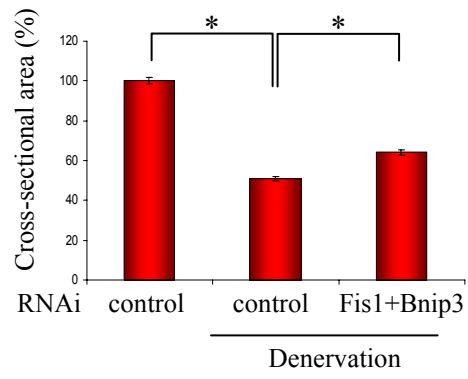

## Supplementary Figure S5

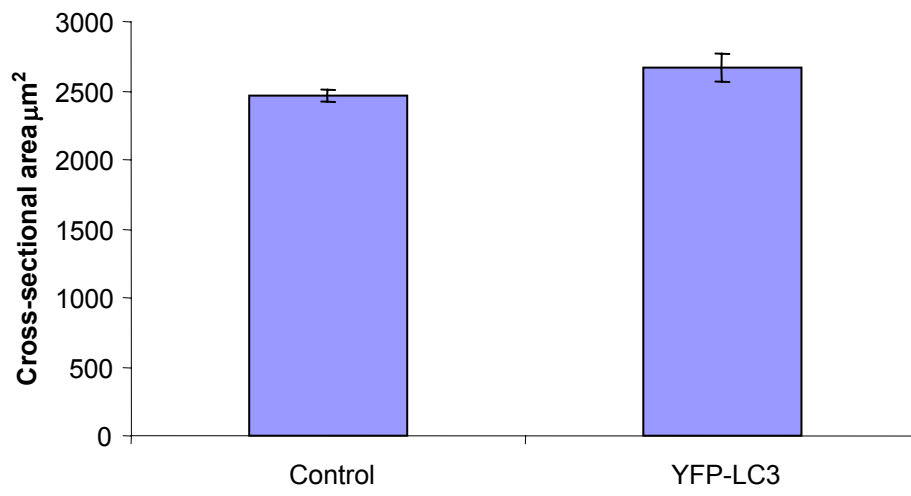

# Supplementary Figure S6

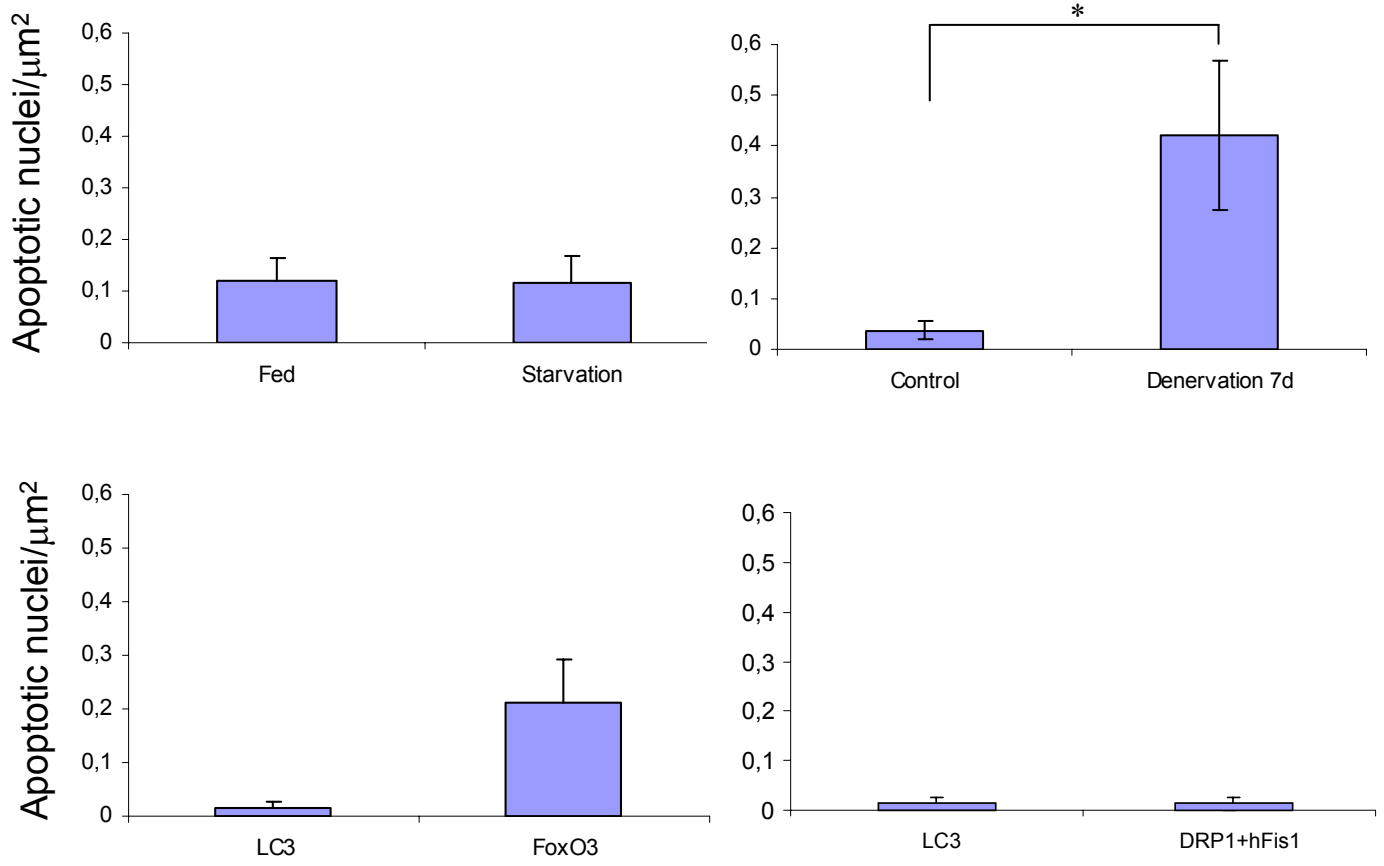



# Supplementary Figure S7

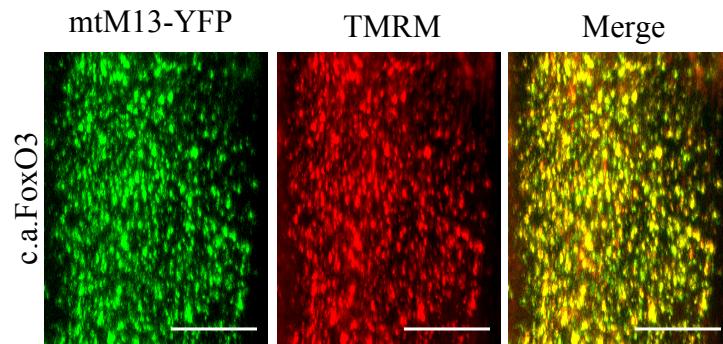

# Supplementary Figure S8

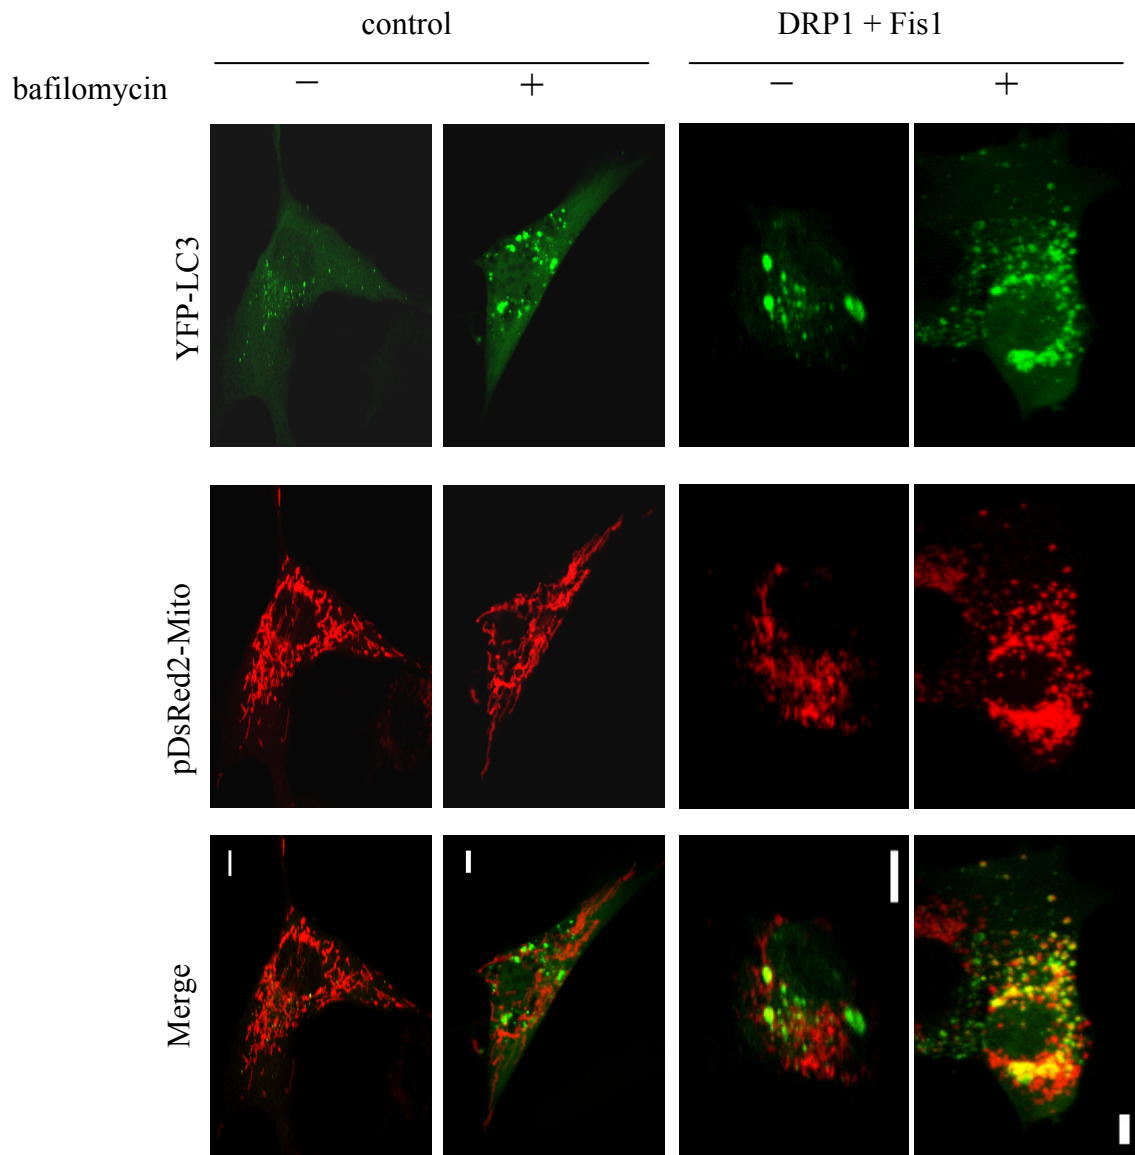

# Supplementary Figure S9

**A**

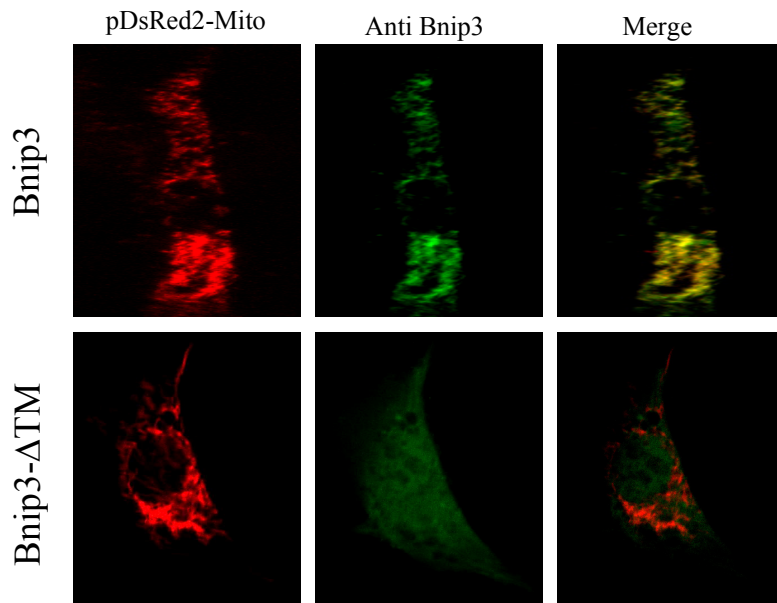

**B**

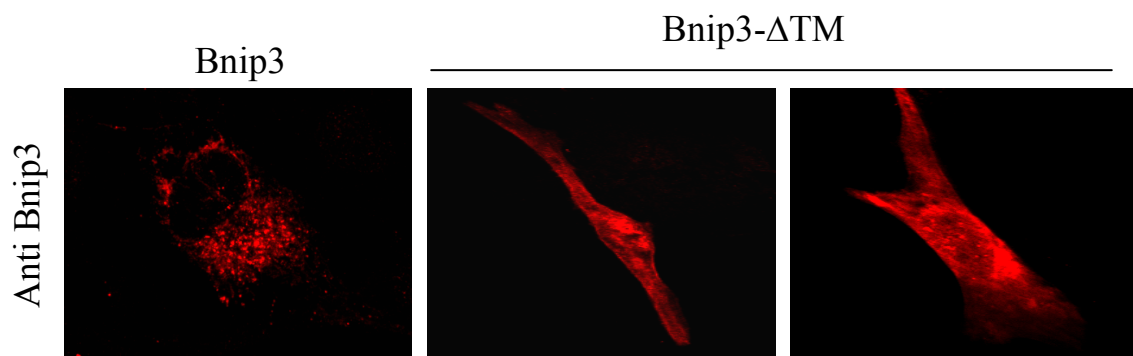

**C**

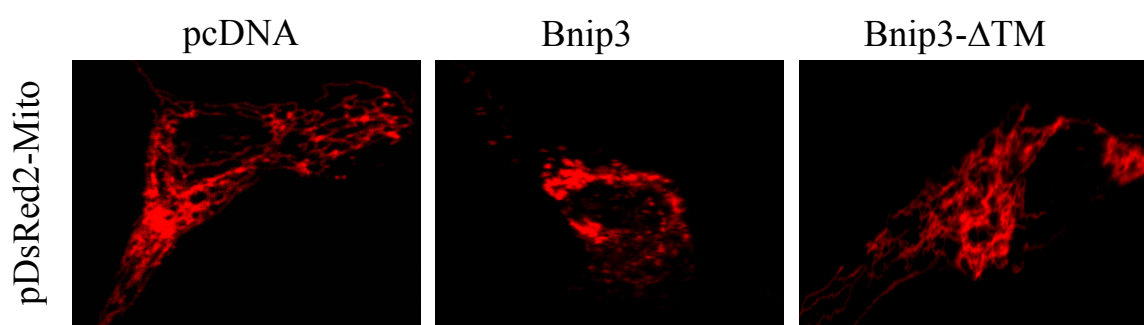

# Supplementary Figure S10

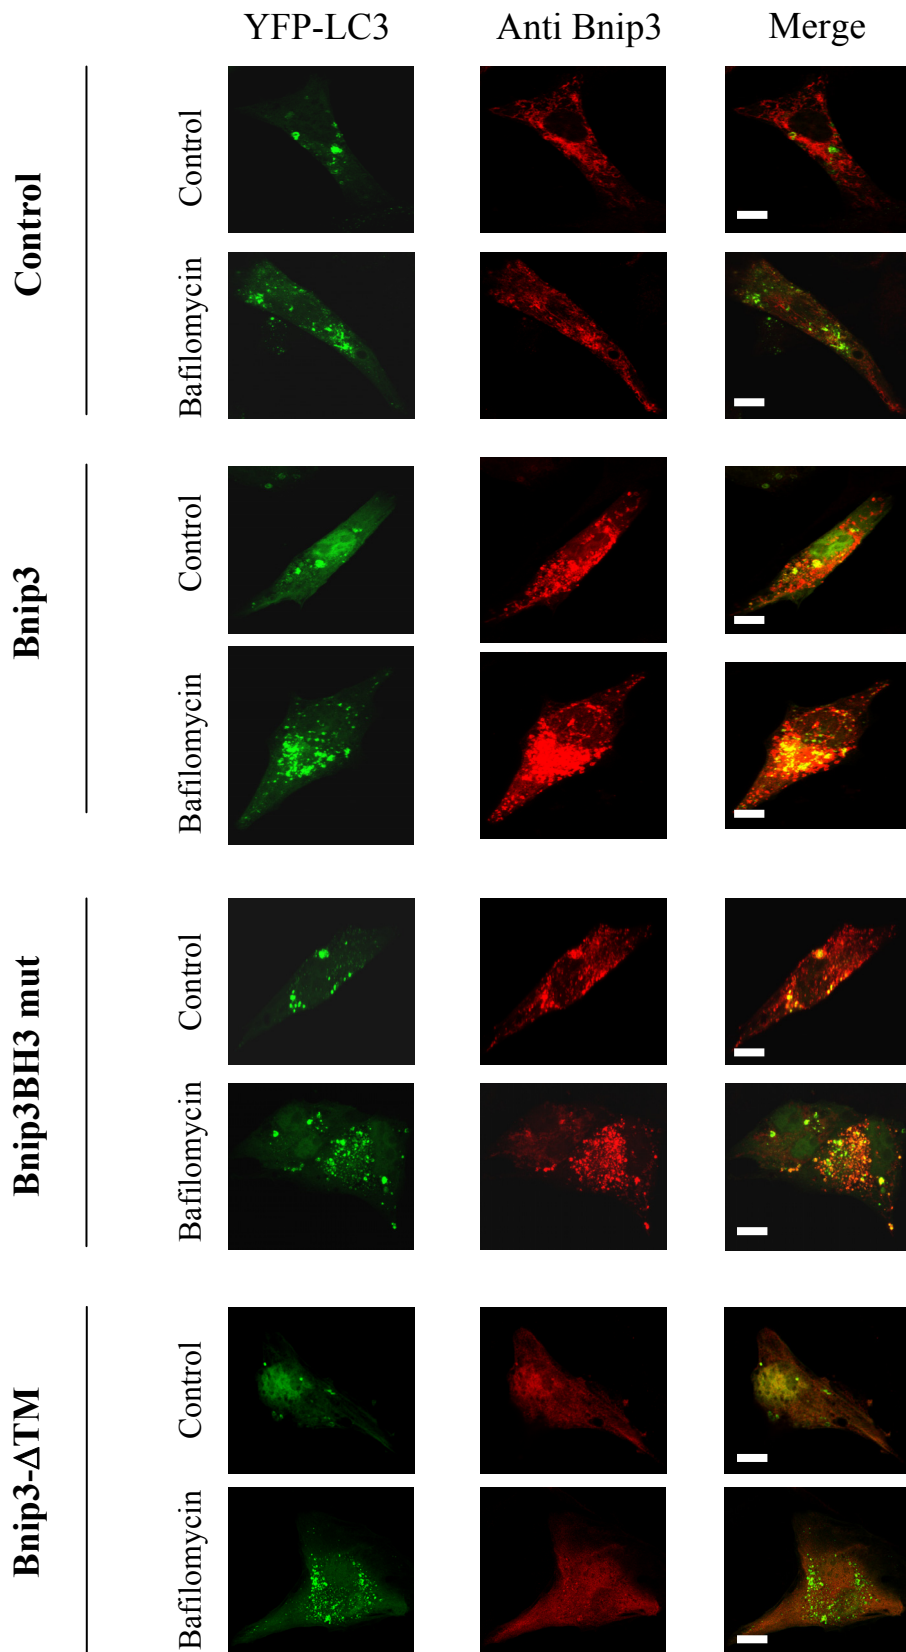

# Supplementary Figure S11

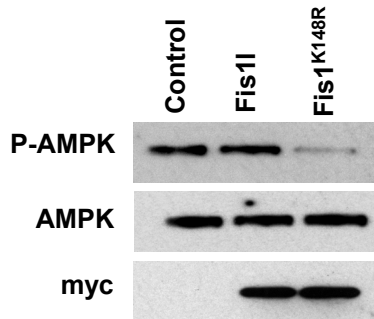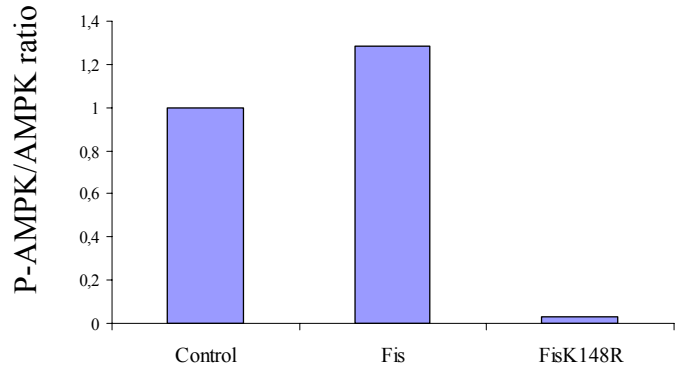

## Supplementary Figure S12

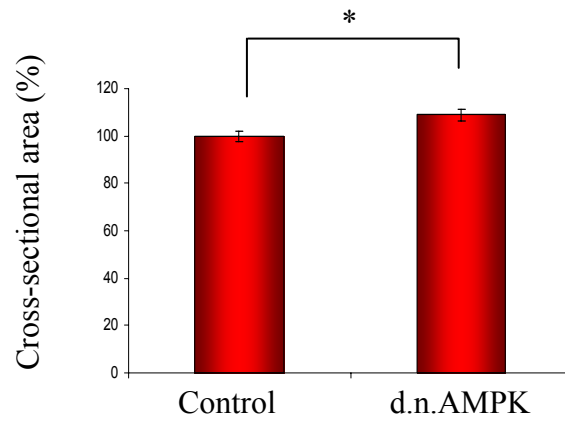

# Supplementary Figure S13

**A**

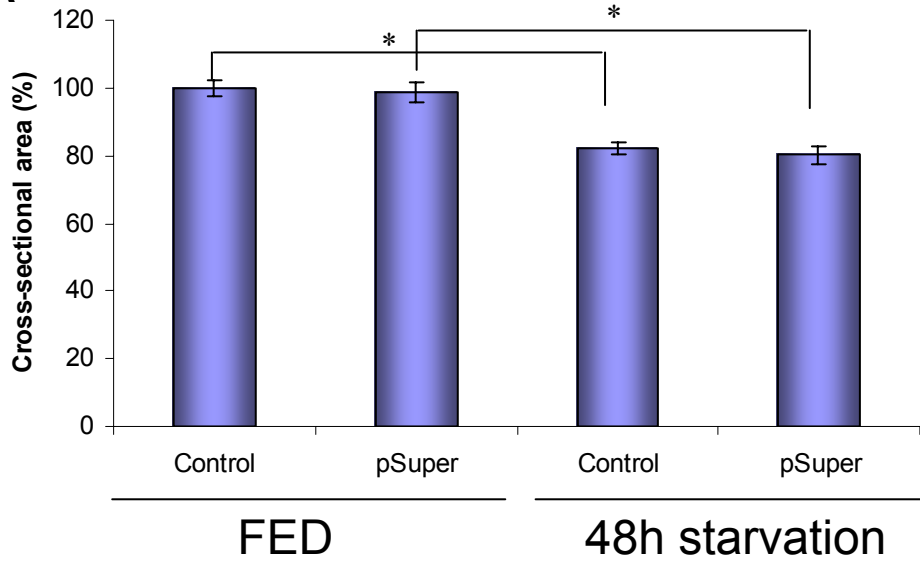

**B**

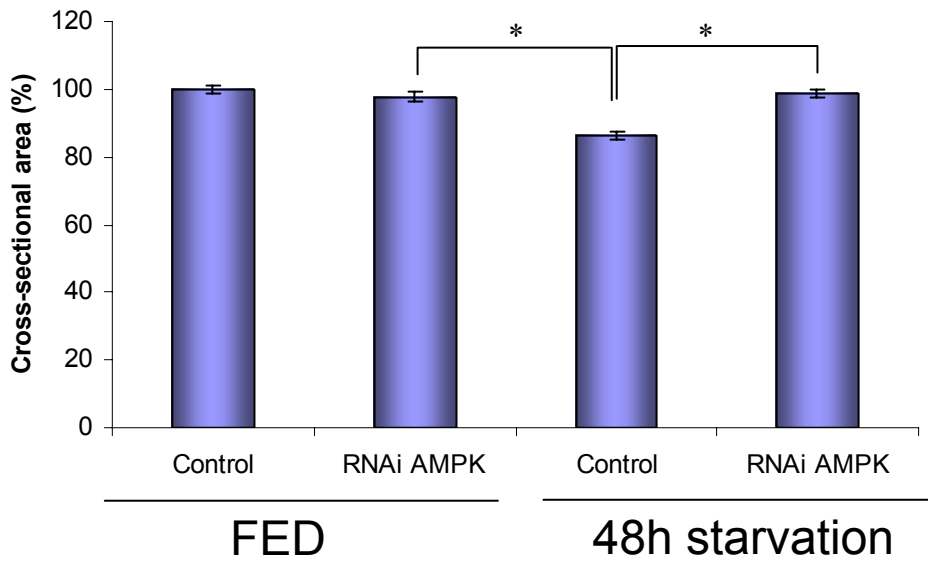

**C**

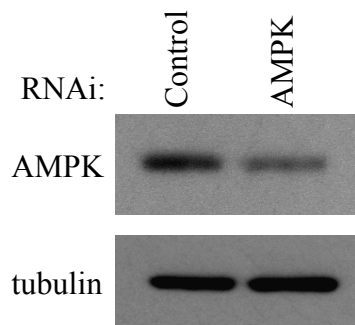

Supplementary Figure S14

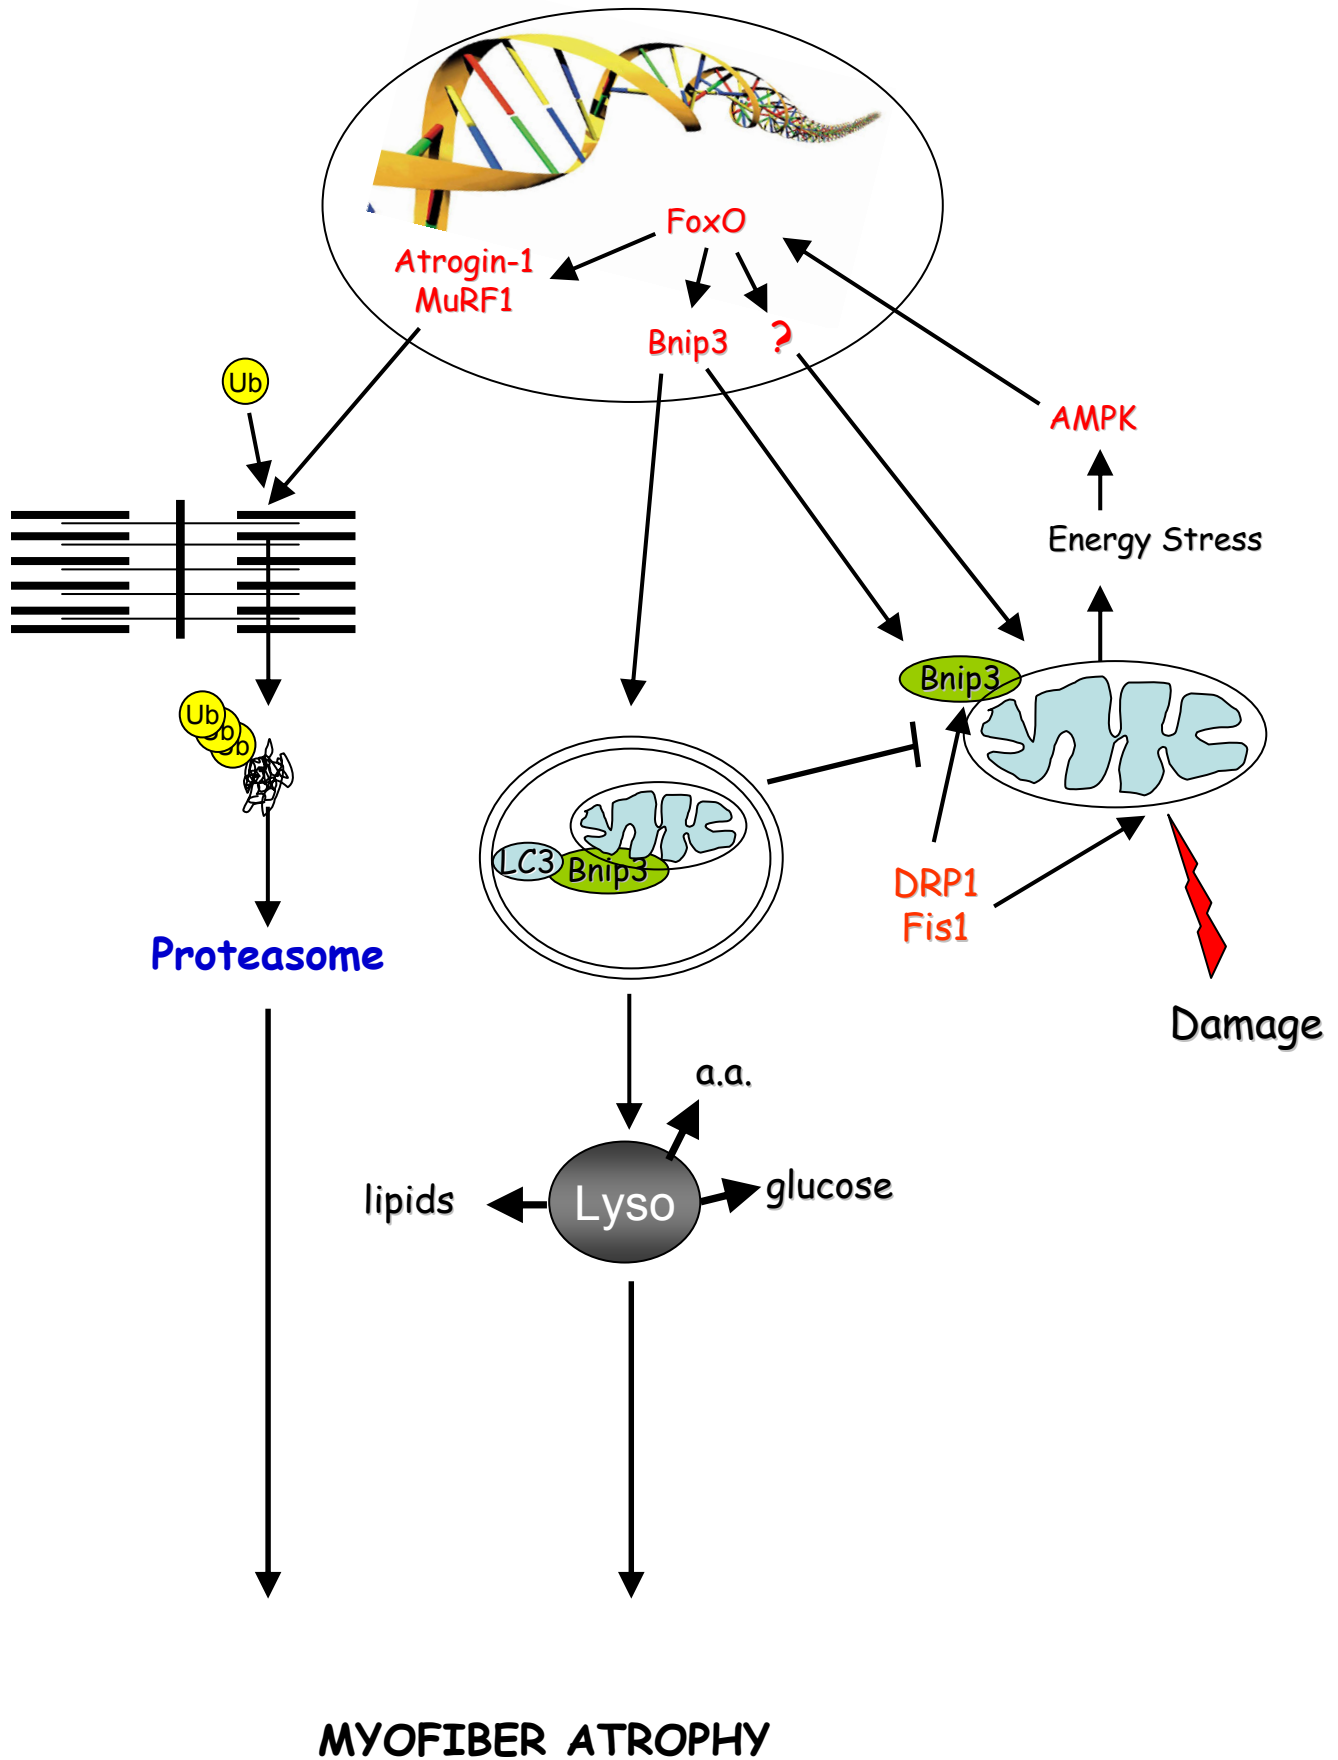

Supplement: emboj201060s1.pdf [file emboj201060s1.pdf]
